# Supplementary material for: Leukocyte telomere length and bipolar disorder risk: evidence from Mendelian randomization analysis
Source: PeerJ journal article supplement (doi:10.7717/peerj.15129), 2023-03-31

# Mendelian randomization study of the association between telomere length and bipolar disorder

133 SNPs associated with telomere length

**Telomere Length**

**Bipolar Disorder**

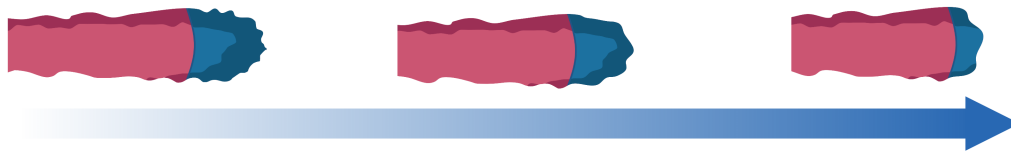

**Telomere Repeats**

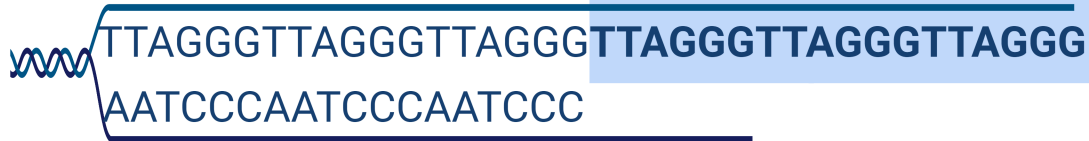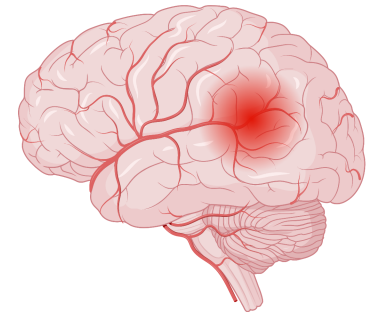

Supplement: Figure_abstract.pdf [file Figure_abstract.pdf]
