# Supplementary material for: Leukocyte telomere length and bipolar disorder risk: evidence from Mendelian randomization analysis
Source: PeerJ journal article supplement (doi:10.7717/peerj.15129), 2023-03-31

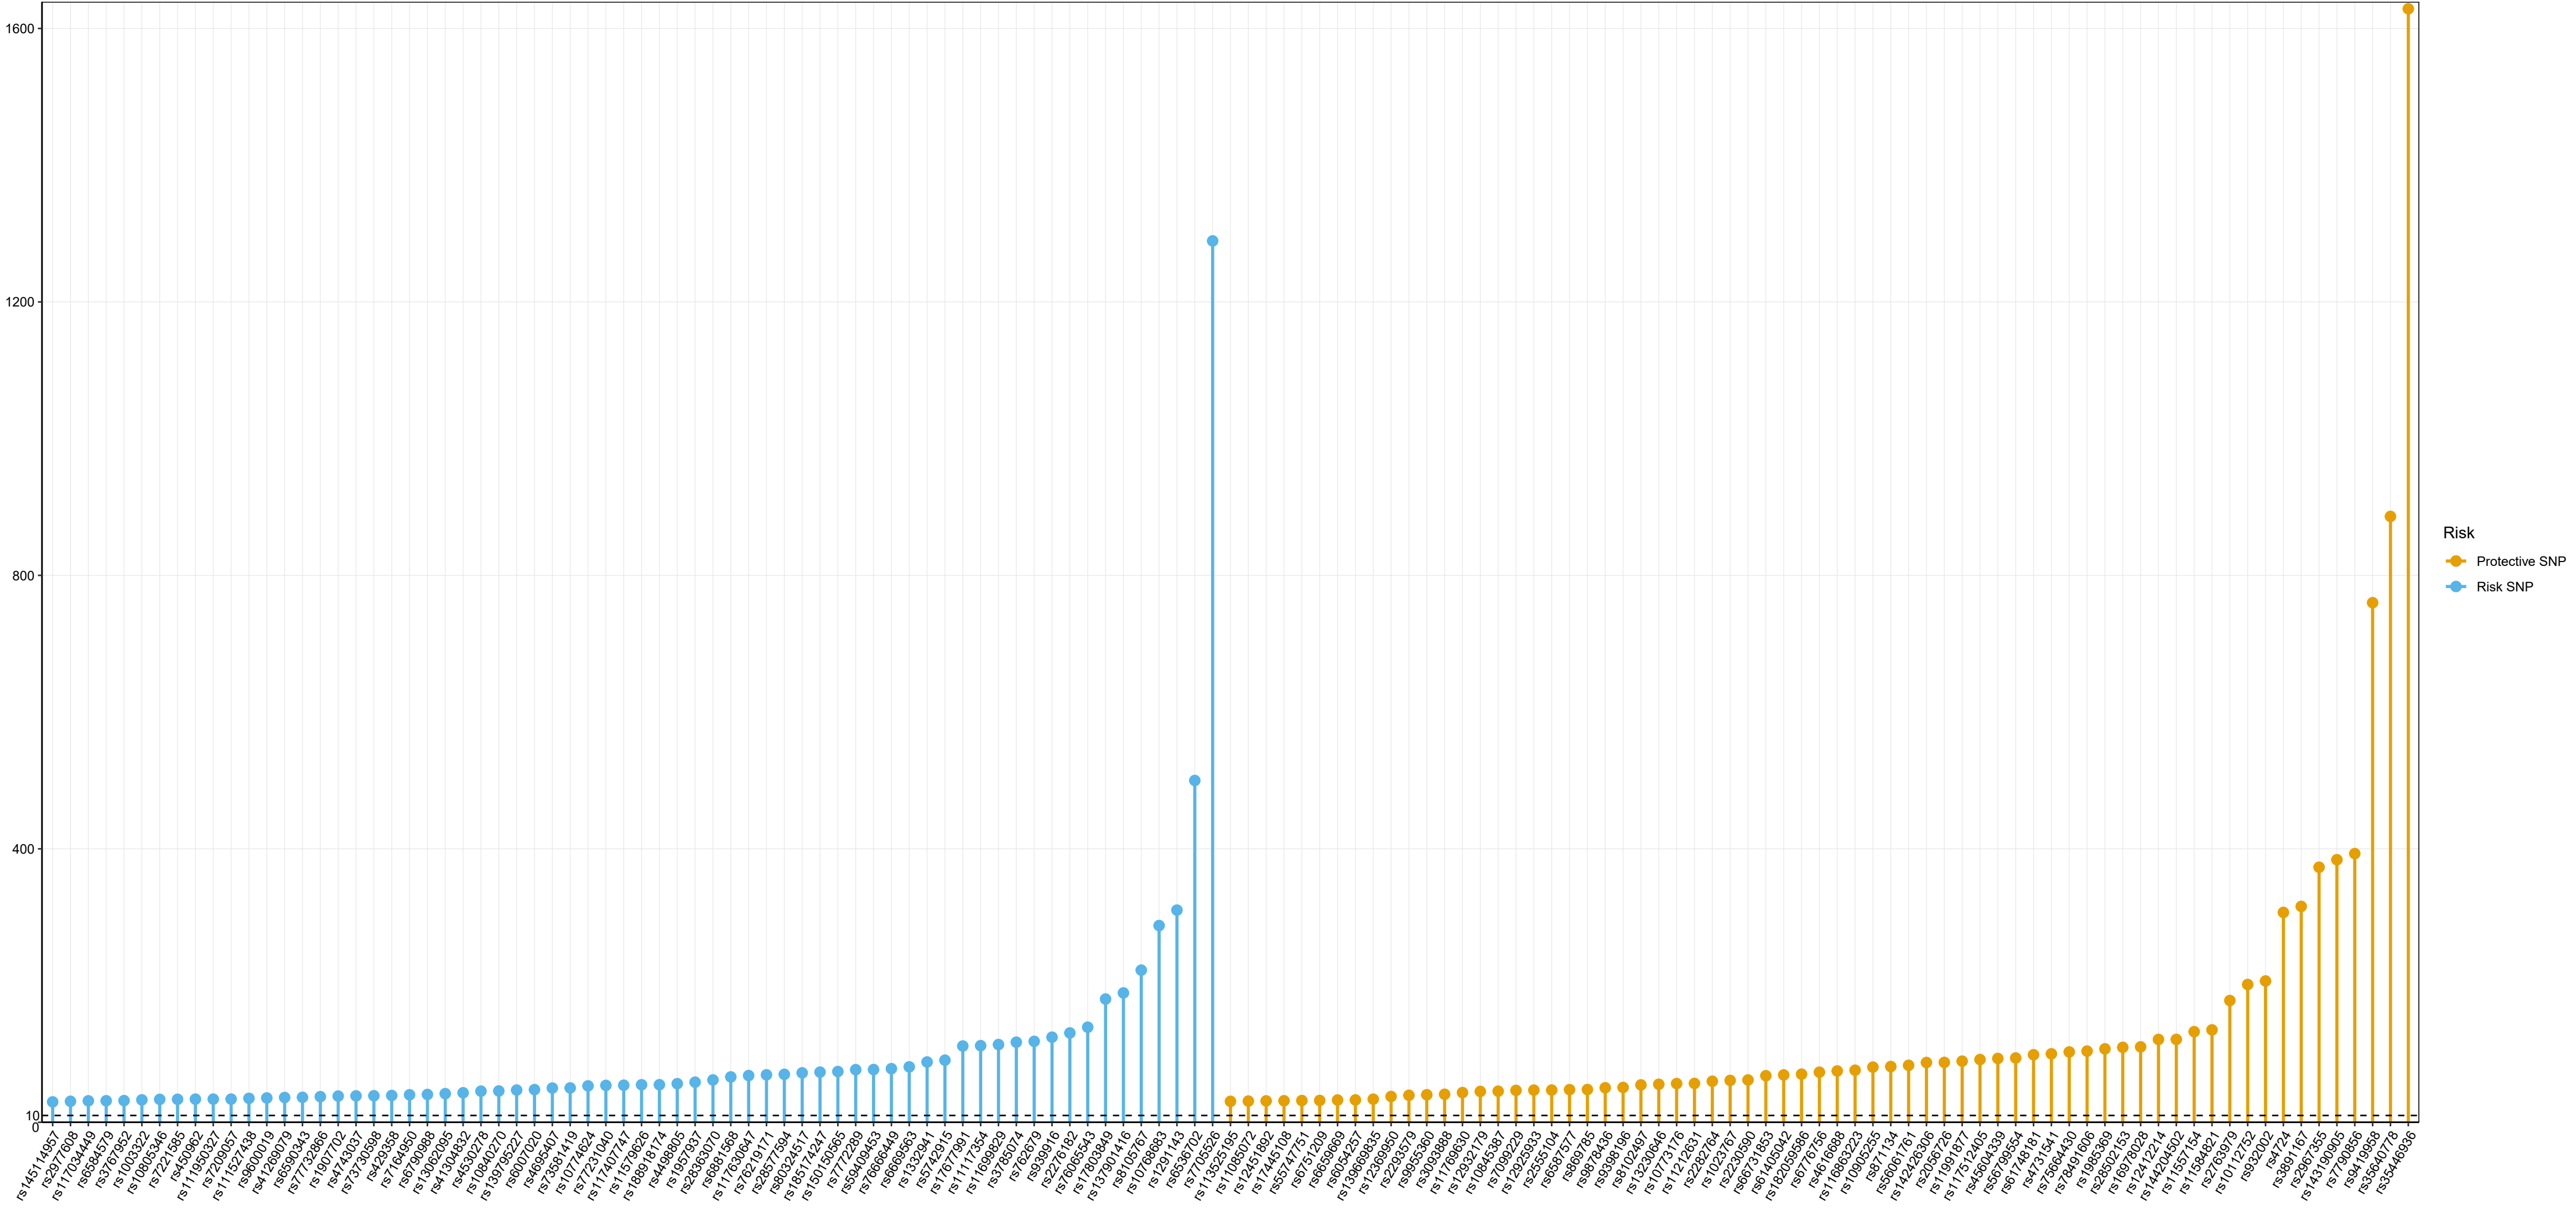

Supplement: Figure_S1.pdf [file Figure_S1.pdf]
