# Supplementary material for: Leukocyte telomere length and bipolar disorder risk: evidence from Mendelian randomization analysis
Source: PeerJ. 2023 Mar 31;11:e15129. doi: 10.7717/peerj.15129 (PMC10069421; doi:10.7717/peerj.15129)
Supplement: Supplemental Information 3 [file peerj-11-15129-s003.xlsx]

## Sheet: Supplementary file 1
					SNPs associated with leukocyte telomere length
Exposure	SNP	Effect_allele	Other_allele	Chromosome	Chr.Position	EAF	Beta	Beta.se	Sample.Size	MAF	R2	F.statistic
telomere length || id:ieu-b-4879	rs1003322	A	C	22	51072289	0.213742	0.0141734	0.00247546	472174	0.213742	2.33356087193292e-05	32.7820615641888
telomere length || id:ieu-b-4879	rs10112752	A	G	8	73958718	0.430369	-0.0287522	0.00202518	472174	0.430369	0.000209303950475598	201.564897423948
telomere length || id:ieu-b-4879	rs1023767	A	G	8	95530969	0.237595	-0.0183732	0.00234772	472174	0.237595	4.69924366906065e-05	61.2458978543652
telomere length || id:ieu-b-4879	rs10768683	G	C	11	5247791	0.841033	0.0469922	0.00277015	472174	0.158967	0.000162964468411188	287.769646129788
telomere length || id:ieu-b-4879	rs10773176	G	A	12	122944713	0.741214	-0.0172009	0.00228534	472174	0.258786	4.60270369784863e-05	56.6501024820826
telomere length || id:ieu-b-4879	rs10774624	A	G	12	111833788	0.53276	0.0149944	0.00205494	472174	0.46724	5.61383242339705e-05	53.2426781306654
telomere length || id:ieu-b-4879	rs10805346	C	T	4	9920347	0.439339	0.0117072	0.00202147	472174	0.439339	3.49944768427922e-05	33.5406499730295
telomere length || id:ieu-b-4879	rs10840270	G	C	11	9629553	0.655684	0.014383	0.00212494	472174	0.344316	4.38112187165955e-05	45.8147812549286
telomere length || id:ieu-b-4879	rs10845387	A	G	12	11757743	0.352666	-0.0141214	0.00209396	472174	0.352666	4.39783249486362e-05	45.4798210621461
telomere length || id:ieu-b-4879	rs10905255	T	G	10	5870267	0.57919	-0.0182493	0.00203099	472174	0.42081	8.335120526968e-05	80.7377888059808
telomere length || id:ieu-b-4879	rs11085072	T	C	19	4368142	0.236909	-0.0131806	0.00236713	472174	0.236909	2.37417079988425e-05	31.0046006452782
telomere length || id:ieu-b-4879	rs11117354	C	T	16	88092092	0.696513	0.0232506	0.00219601	472174	0.303487	0.000100368387806332	112.098474495728
telomere length || id:ieu-b-4879	rs111527438	C	T	17	29252703	0.351251	0.0125	0.00211016	472174	0.351251	3.38697078495455e-05	35.0904755087757
telomere length || id:ieu-b-4879	rs111950327	C	G	16	48283993	0.063628	0.0238271	0.00409406	472174	0.063628	8.54788333880604e-06	33.8714640436317
telomere length || id:ieu-b-4879	rs11212631	C	T	11	108304509	0.199229	-0.0193458	0.00256554	472174	0.199229	3.84241815031245e-05	56.8611719831218
telomere length || id:ieu-b-4879	rs113525195	A	C	14	23499321	0.290254	-0.0124075	0.00224132	472174	0.290254	2.67405249208984e-05	30.6450853151872
telomere length || id:ieu-b-4879	rs11557154	T	C	9	34107505	0.13003	-0.0343719	0.00298538	472174	0.13003	6.35160682737739e-05	132.558579393374
telomere length || id:ieu-b-4879	rs11579626	C	A	1	146741960	0.084882	0.0265113	0.00357752	472174	0.084882	1.80683517153942e-05	54.9158749839516
telomere length || id:ieu-b-4879	rs11584821	T	C	1	114419489	0.176208	-0.0306517	0.00263623	472174	0.176208	8.31215542250023e-05	135.189367673064
telomere length || id:ieu-b-4879	rs116863223	A	G	18	709396	0.011763	-0.0817874	0.00937157	472174	0.011763	3.75020692289867e-06	76.1637112192494
telomere length || id:ieu-b-4879	rs11699829	A	G	20	62157200	0.034146	0.0641957	0.00602028	472174	0.034146	1.58839218556112e-05	113.704720925276
telomere length || id:ieu-b-4879	rs117034449	A	G	10	103855348	0.023304	0.0374377	0.00667898	472174	0.023304	3.02911555289008e-06	31.4194105918387
telomere length || id:ieu-b-4879	rs117407747	T	C	7	159117178	0.027571	0.0450533	0.00611706	472174	0.027571	6.16035982755238e-06	54.2460017228645
telomere length || id:ieu-b-4879	rs117512405	A	G	20	62574274	0.017043	-0.0790134	0.00824611	472174	0.017043	6.51495984003923e-06	91.8128043355113
telomere length || id:ieu-b-4879	rs117630647	A	G	7	124779510	0.021346	0.059565	0.00720413	472174	0.021346	6.04912859444211e-06	68.3627004711003
telomere length || id:ieu-b-4879	rs11769630	A	T	7	50257703	0.072227	-0.0256807	0.00389475	472174	0.072227	1.23402448107496e-05	43.4764968253817
telomere length || id:ieu-b-4879	rs11991877	A	T	8	56664524	0.889309	-0.030138	0.00318686	472174	0.110691	3.72902943649356e-05	89.4340476586924
telomere length || id:ieu-b-4879	rs12369950	C	T	12	24762109	0.140675	-0.0178308	0.00290205	472174	0.140675	1.93301032189113e-05	37.7512969167461
telomere length || id:ieu-b-4879	rs12412214	A	G	10	101276256	0.279765	-0.0245174	0.00222685	472174	0.279765	0.000103457606527919	121.217939392613
telomere length || id:ieu-b-4879	rs12451892	C	T	17	2247982	0.380511	-0.0116145	0.00207578	472174	0.380511	3.12584278938965e-05	31.3067791920362
telomere length || id:ieu-b-4879	rs1291143	C	A	20	35525640	0.849026	0.0493145	0.0027991	472174	0.150974	0.000168524682634826	310.393372631305
telomere length || id:ieu-b-4879	rs12925933	C	A	16	90141355	0.66221	-0.0146622	0.00213796	472174	0.33779	4.45625030568094e-05	47.0326151363323
telomere length || id:ieu-b-4879	rs12932179	G	A	16	9072085	0.561399	-0.0136257	0.0020276	472174	0.438601	4.7100146621741e-05	45.1599113166493
telomere length || id:ieu-b-4879	rs13062095	C	T	3	101267385	0.327843	0.0138552	0.00214113	472174	0.327843	3.90844579098037e-05	41.8735252978306
telomere length || id:ieu-b-4879	rs13230646	C	T	7	23930316	0.248945	-0.0173277	0.00232377	472174	0.248945	4.40350643567667e-05	55.6026588185178
telomere length || id:ieu-b-4879	rs1332941	G	A	13	41695100	0.820466	0.0256552	0.00273159	472174	0.179534	5.50370316924338e-05	88.2103978702549
telomere length || id:ieu-b-4879	rs137901416	A	G	14	73418095	0.100311	0.04572	0.00332355	472174	0.100311	7.23397339082106e-05	189.237852054122
telomere length || id:ieu-b-4879	rs139669835	T	C	18	729871	0.009365	-0.0612563	0.0105346	472174	0.009365	1.32866286817356e-06	33.8115766010398
telomere length || id:ieu-b-4879	rs139795227	C	A	1	92842367	0.014021	0.0599379	0.00873247	472174	0.014021	2.75869331154393e-06	47.1117070743215
telomere length || id:ieu-b-4879	rs142426306	T	C	20	62488152	0.039544	-0.0504903	0.00539933	472174	0.039544	1.40676694985339e-05	87.4452369194164
telomere length || id:ieu-b-4879	rs143190905	T	G	20	62291767	0.080404	-0.0723995	0.00369421	472174	0.080404	0.000120290305966968	384.085555429904
telomere length || id:ieu-b-4879	rs144204502	T	C	17	76183233	0.012562	-0.100574	0.00913369	472174	0.012562	6.37052850322682e-06	121.249208237796
telomere length || id:ieu-b-4879	rs145114957	G	C	1	94322469	0.042648	0.0272605	0.00498872	472174	0.042648	5.16401649710474e-06	29.8599706240603
telomere length || id:ieu-b-4879	rs150150565	T	C	18	708207	0.021455	0.063762	0.00739877	472174	0.021455	6.60453210346925e-06	74.2685265868724
telomere length || id:ieu-b-4879	rs16978028	T	A	18	42070981	0.143727	-0.029945	0.00285068	472174	0.143727	5.75215042055358e-05	110.344755642193
telomere length || id:ieu-b-4879	rs17445108	A	G	12	57082058	0.12695	-0.0168922	0.00300983	472174	0.12695	1.47872782335544e-05	31.4984001713482
telomere length || id:ieu-b-4879	rs17677991	G	C	15	42032383	0.342123	0.0222664	0.00210806	472174	0.342123	0.000106362608376469	111.566569092317
telomere length || id:ieu-b-4879	rs17803849	T	C	2	210673445	0.405161	0.0273203	0.00203482	472174	0.405161	0.000184023772007572	180.26812131072
telomere length || id:ieu-b-4879	rs182059586	C	T	16	14652220	0.02511	-0.0571159	0.00680853	472174	0.02511	7.29688653392759e-06	70.3732062603876
telomere length || id:ieu-b-4879	rs185174247	A	G	5	138914024	0.05609	0.0372806	0.00435145	472174	0.05609	1.64604515563569e-05	73.4002926328087
telomere length || id:ieu-b-4879	rs188918174	T	C	2	54473646	0.036106	0.0403062	0.00543604	472174	0.036106	8.10429058874256e-06	54.976669114651
telomere length || id:ieu-b-4879	rs1907702	A	G	12	88955469	0.766771	0.0150247	0.00242651	472174	0.233229	2.9041804872716e-05	38.3395885123493
telomere length || id:ieu-b-4879	rs1957937	T	A	14	96181360	0.16018	0.0209365	0.00273361	472174	0.16018	3.34239276577189e-05	58.6590538786196
telomere length || id:ieu-b-4879	rs1985369	G	A	7	159119220	0.868178	-0.0311893	0.00300952	472174	0.131822	5.206446225946e-05	107.403092871104
telomere length || id:ieu-b-4879	rs2056726	A	G	7	99780283	0.214376	-0.0228078	0.00243638	472174	0.214376	6.25166319268854e-05	87.6348283832373
telomere length || id:ieu-b-4879	rs2230590	C	T	3	49936102	0.510897	-0.0158022	0.00200806	472174	0.489103	6.55455698341683e-05	61.927241886254
telomere length || id:ieu-b-4879	rs2276182	G	C	18	51798047	0.403227	0.0233529	0.00204247	472174	0.403227	0.000133246853935128	130.728496576177
telomere length || id:ieu-b-4879	rs2282764	G	A	4	2255063	0.142384	-0.0224234	0.00289392	472174	0.142384	3.10535944167352e-05	60.0385072619036
telomere length || id:ieu-b-4879	rs2293579	A	G	11	47440758	0.386274	-0.012915	0.00205481	472174	0.386274	3.96682832226569e-05	39.504400888118
telomere length || id:ieu-b-4879	rs2555104	C	A	2	17841243	0.434255	-0.0139717	0.00203498	472174	0.434255	4.9053691071929e-05	47.1387664197746
telomere length || id:ieu-b-4879	rs2763979	T	C	6	31794592	0.359721	-0.0277713	0.00208092	472174	0.359721	0.000173757927469649	178.107271817055
telomere length || id:ieu-b-4879	rs28363070	A	G	5	1415068	0.013389	0.0755557	0.00959987	472174	0.013389	3.46597786196978e-06	61.9446442629689
telomere length || id:ieu-b-4879	rs28502153	A	C	22	17469049	0.377958	-0.0215916	0.00206208	472174	0.377958	0.000109181689299503	109.637375758685
telomere length || id:ieu-b-4879	rs28577594	C	G	12	123895906	0.709829	0.0187657	0.00224024	472174	0.290171	6.12175739891928e-05	70.1682173909781
telomere length || id:ieu-b-4879	rs2967355	C	A	16	82200103	0.774276	-0.0461595	0.00238972	472174	0.225724	0.000276203779556988	373.102496696546
telomere length || id:ieu-b-4879	rs2977608	C	A	1	768253	0.743949	0.0129483	0.00233716	472174	0.256051	2.47654477053228e-05	30.6936556437913
telomere length || id:ieu-b-4879	rs3093888	A	G	14	20812951	0.05131	-0.028973	0.00452459	472174	0.05131	8.45439888003109e-06	41.0042119952773
telomere length || id:ieu-b-4879	rs35446936	A	G	3	169486508	0.243674	-0.0940025	0.00232918	472174	0.243674	0.00127150728350192	1628.81853642981
telomere length || id:ieu-b-4879	rs35640778	A	G	20	62321128	0.020757	-0.209011	0.00702087	472174	0.020757	7.63026129608218e-05	886.250356720721
telomere length || id:ieu-b-4879	rs3767952	A	G	1	41231032	0.226709	0.0134472	0.00238826	472174	0.226709	2.35418268956944e-05	31.7030115270102
telomere length || id:ieu-b-4879	rs3785074	G	A	16	69406986	0.289672	0.023863	0.00220455	472174	0.289672	0.000102118294877208	117.168312748303
telomere length || id:ieu-b-4879	rs3891167	G	A	18	658423	0.253435	-0.0425685	0.00239551	472174	0.253435	0.000253071280099913	315.777162422806
telomere length || id:ieu-b-4879	rs41269079	A	T	1	45252015	0.188991	0.0153617	0.0025499	472174	0.188991	2.35628047338602e-05	36.2937849069381
telomere length || id:ieu-b-4879	rs41304832	A	G	20	62375508	0.012378	0.0611702	0.0093095	472174	0.012378	2.23561105630418e-06	43.1744772968559
telomere length || id:ieu-b-4879	rs429358	C	T	19	45411941	0.153969	0.0173498	0.00277091	472174	0.153969	2.16317471471095e-05	39.2052389946792
telomere length || id:ieu-b-4879	rs4498805	T	G	1	110910397	0.546632	0.0150601	0.00200376	472174	0.453368	5.92977407636474e-05	56.4890545026558
telomere length || id:ieu-b-4879	rs450962	G	A	16	28413517	0.283779	0.0142833	0.00245428	472174	0.283779	2.91584296120766e-05	33.8695088903523
telomere length || id:ieu-b-4879	rs4530278	T	G	19	33752994	0.59815	0.0138793	0.0020567	472174	0.40185	4.63655308263904e-05	45.5400213709413
telomere length || id:ieu-b-4879	rs45604339	T	C	14	65543102	0.34242	-0.020433	0.00211433	472174	0.34242	8.90747005987471e-05	93.3939461704473
telomere length || id:ieu-b-4879	rs4616688	T	G	3	160042459	0.525394	-0.0173476	0.00200198	472174	0.474606	7.93059167620816e-05	75.0860624445101
telomere length || id:ieu-b-4879	rs4695407	G	A	4	48843372	0.507843	0.0141511	0.00199925	472174	0.492157	5.30404566052894e-05	50.1009764894172
telomere length || id:ieu-b-4879	rs4724	A	G	17	7760397	0.116598	-0.0547446	0.00312441	472174	0.116598	0.000133944208767586	307.005768300739
telomere length || id:ieu-b-4879	rs4731541	G	C	7	128678236	0.624901	-0.0206119	0.00205962	472174	0.375099	9.94367463031904e-05	100.152513413841
telomere length || id:ieu-b-4879	rs4743037	T	C	9	109639970	0.230874	0.0147971	0.00238094	472174	0.230874	2.9050710711876e-05	38.6239169952164
telomere length || id:ieu-b-4879	rs55747751	A	G	5	132397351	0.077375	-0.0211612	0.00375164	472174	0.077375	9.62037664155178e-06	31.8154645088475
telomere length || id:ieu-b-4879	rs56061761	A	G	16	70187811	0.332642	-0.0203556	0.0022296	472174	0.332642	7.83750417978942e-05	83.351593087698
telomere length || id:ieu-b-4879	rs56799554	G	A	17	41456413	0.170183	-0.0259793	0.00267858	472174	0.170183	5.62693729905757e-05	94.0688092184195
telomere length || id:ieu-b-4879	rs5742915	C	T	15	74336633	0.445829	0.0193377	0.00202886	472174	0.445829	9.50704421023431e-05	90.8459303867677
telomere length || id:ieu-b-4879	rs59409453	G	A	17	1666218	0.730602	0.0202133	0.00230175	472174	0.269398	6.42926445840176e-05	77.1184229508649
telomere length || id:ieu-b-4879	rs6007020	C	T	22	45790132	0.367823	0.0144904	0.00209637	472174	0.367823	4.70576652317721e-05	47.7776600461713
telomere length || id:ieu-b-4879	rs6054257	A	G	20	66370	0.793522	-0.0141684	0.00247729	472174	0.206478	2.27011889056204e-05	32.7105554977217
telomere length || id:ieu-b-4879	rs61405042	T	C	7	67200	0.029288	-0.0501874	0.00602955	472174	0.029288	8.3431035438313e-06	69.2818686399823
telomere length || id:ieu-b-4879	rs61748181	T	C	5	1294166	0.028928	-0.059181	0.00595394	472174	0.028928	1.17558343556577e-05	98.7997148179872
telomere length || id:ieu-b-4879	rs6536702	A	G	4	164028105	0.774647	0.0534148	0.00238875	472174	0.225353	0.000369723390331366	500.013595525643
telomere length || id:ieu-b-4879	rs6584579	G	A	10	105645725	0.398876	0.0114923	0.00204674	472174	0.398876	3.20197881830742e-05	31.5274288741055
telomere length || id:ieu-b-4879	rs6587577	G	A	1	151402045	0.826346	-0.0182148	0.0026359	472174	0.173654	2.9024557070832e-05	47.7519327033364
telomere length || id:ieu-b-4879	rs6590343	G	A	11	128500215	0.516385	0.0121739	0.00201444	472174	0.483615	3.86324360633643e-05	36.5216833776076
telomere length || id:ieu-b-4879	rs6659669	T	C	1	185315067	0.605095	-0.0117091	0.00205167	472174	0.394905	3.29667501796717e-05	32.5710690927941
telomere length || id:ieu-b-4879	rs6669563	A	G	1	32279629	0.437768	0.0182358	0.00202476	472174	0.437768	8.45648795901337e-05	81.1152546246625
telomere length || id:ieu-b-4879	rs66731853	A	G	1	20916238	0.317304	-0.0177791	0.00215421	472174	0.317304	6.24991774764124e-05	68.115111232518
telomere length || id:ieu-b-4879	rs6751209	C	T	2	43588302	0.204231	-0.0140465	0.00248465	472174	0.204231	2.20009995952266e-05	31.9599290117242
telomere length || id:ieu-b-4879	rs6776756	A	G	3	128215821	0.597562	-0.0174439	0.00203747	472174	0.402438	7.46645774464849e-05	73.3001276578596
telomere length || id:ieu-b-4879	rs6790988	G	A	3	170263320	0.741902	0.0145728	0.00228428	472174	0.258098	3.30100697558625e-05	40.6993370023196
telomere length || id:ieu-b-4879	rs6881568	A	C	5	1670265	0.36258	0.0169256	0.00207735	472174	0.36258	6.4986964903912e-05	66.3848223590679
telomere length || id:ieu-b-4879	rs7099229	A	G	10	96134685	0.273301	-0.0153288	0.00224403	472174	0.273301	3.92538906462737e-05	46.6615325338284
telomere length || id:ieu-b-4879	rs7164950	G	A	15	56775385	0.405979	0.0129362	0.00204001	472174	0.405979	4.10754324601297e-05	40.2113681786229
telomere length || id:ieu-b-4879	rs7209057	A	G	17	65705530	0.561044	0.011819	0.00202865	472174	0.438956	3.54073197585682e-05	33.9427647924333
telomere length || id:ieu-b-4879	rs7221585	T	C	17	76195153	0.22401	0.0143271	0.00247042	472174	0.22401	2.47643225657653e-05	33.6337270271885
telomere length || id:ieu-b-4879	rs73581419	T	C	14	21941148	0.106605	0.0229838	0.00324156	472174	0.106605	2.02807754699436e-05	50.2730852319984
telomere length || id:ieu-b-4879	rs73730598	A	G	5	77973	0.054793	0.0273632	0.00439272	472174	0.054793	8.5122949162471e-06	38.8031271318658
telomere length || id:ieu-b-4879	rs75664430	G	C	17	8064779	0.248028	-0.0235179	0.0023186	472174	0.248028	8.12785080713485e-05	102.883425514757
telomere length || id:ieu-b-4879	rs76065543	T	C	16	74678063	0.137527	0.0342843	0.00290708	472174	0.137527	6.9877604906905e-05	139.083818879949
telomere length || id:ieu-b-4879	rs76219171	A	G	16	50188929	0.058433	0.0359839	0.00431741	472174	0.058433	1.61885225851351e-05	69.4656135835823
telomere length || id:ieu-b-4879	rs762679	A	T	8	48885436	0.856501	0.0310104	0.00285024	472174	0.143499	6.16249458316155e-05	118.372787610745
telomere length || id:ieu-b-4879	rs76666449	C	T	12	120904895	0.100625	0.0295125	0.00333186	472174	0.100625	3.00755197898019e-05	78.4582308106228
telomere length || id:ieu-b-4879	rs7705526	A	C	5	1285974	0.326578	0.0776022	0.00216124	472174	0.326578	0.00120100336771066	1289.2646454077
telomere length || id:ieu-b-4879	rs77231040	C	G	10	106280527	0.005742	0.0989303	0.0134649	472174	0.005742	1.3053969572013e-06	53.9824246642375
telomere length || id:ieu-b-4879	rs7772289	T	G	6	28674322	0.503081	0.017549	0.00200003	472174	0.496919	8.15235667728644e-05	76.989540546461
telomere length || id:ieu-b-4879	rs77732866	A	G	2	58979879	0.137597	0.0177942	0.00290595	472174	0.137597	1.88463742172359e-05	37.4956304392965
telomere length || id:ieu-b-4879	rs7790856	T	C	7	124459852	0.289139	-0.0437199	0.00220526	472174	0.289139	0.000342182668563818	393.041781507438
telomere length || id:ieu-b-4879	rs78491606	C	A	3	72891547	0.018433	-0.0756311	0.00741168	472174	0.018433	7.9801565623697e-06	104.127996709197
telomere length || id:ieu-b-4879	rs80324517	A	G	6	204031	0.048259	0.0396515	0.00466286	472174	0.048259	1.40682317340693e-05	72.3126854274601
telomere length || id:ieu-b-4879	rs8102497	A	G	19	57370055	0.431828	-0.0149654	0.0020233	472174	0.431828	5.68557834522153e-05	54.7086622628614
telomere length || id:ieu-b-4879	rs8105767	G	A	19	22215441	0.29467	0.0328384	0.00220117	472174	0.29467	0.000195935447338653	222.564968065127
telomere length || id:ieu-b-4879	rs869785	C	T	3	24347800	0.672471	-0.0147303	0.00212801	472174	0.327529	4.47020150847334e-05	47.9154812847861
telomere length || id:ieu-b-4879	rs871134	T	C	4	7044380	0.569032	-0.0182986	0.0020263	472174	0.430968	8.47106237204199e-05	81.5508024177813
telomere length || id:ieu-b-4879	rs932002	T	C	1	226577306	0.150843	-0.0402052	0.00279667	472174	0.150843	0.000112130326795593	206.672173209049
telomere length || id:ieu-b-4879	rs9398196	G	A	6	109601554	0.52005	-0.0143586	0.00201175	472174	0.47995	5.38573769017821e-05	50.9420214423436
telomere length || id:ieu-b-4879	rs939916	A	G	11	202253	0.669967	0.0241795	0.00216724	472174	0.330033	0.000116578730493449	124.474564798475
telomere length || id:ieu-b-4879	rs9419958	C	T	10	105675946	0.86139	-0.0810098	0.00293847	472174	0.13861	0.000384374805362616	760.033259300768
telomere length || id:ieu-b-4879	rs9600019	T	C	13	73317585	0.335579	0.0127134	0.00213096	472174	0.335579	3.36154461620978e-05	35.5936747260706
telomere length || id:ieu-b-4879	rs9878436	T	C	3	138244400	0.434393	-0.0143407	0.00201819	472174	0.434393	5.25462976836735e-05	50.4913056805931
telomere length || id:ieu-b-4879	rs9955360	A	C	18	78008334	0.869288	-0.0190311	0.00299791	472174	0.130712	1.93953522600676e-05	40.2986595969746
